# Supplementary material for: A simplified chemical kinetic model with a reaction mechanism based on a multidimensional average error iteration method for ammonia and ammonia/hydrogen combustion
Source: Royal Society of Chemistry journal article supplement (doi:10.1039/d4re00274a), 2024-01-01
Supplement: d4re00274a2.pdf [file d4re00274a2.pdf]

## Supplementary Materials

### A simplified chemical kinetic model with a reaction mechanism based on multidimensional average error iteration method for ammonia and ammonia/hydrogen combustion

Daiyao Yue, Chongkai Zhao, Rui Sun, Jieyu Jiang, Chunjie Sui, Xin Zhong, Bin Zhang\*

College of Electromechanical Engineering, Qingdao University of Science and Technology, Qingdao 266061, China

(\*Corresponding author: zb-sh@163.com)

#### S1 Additional validations of the present model

##### 1 Laminar flame speeds

###### 1.1 H<sub>2</sub>

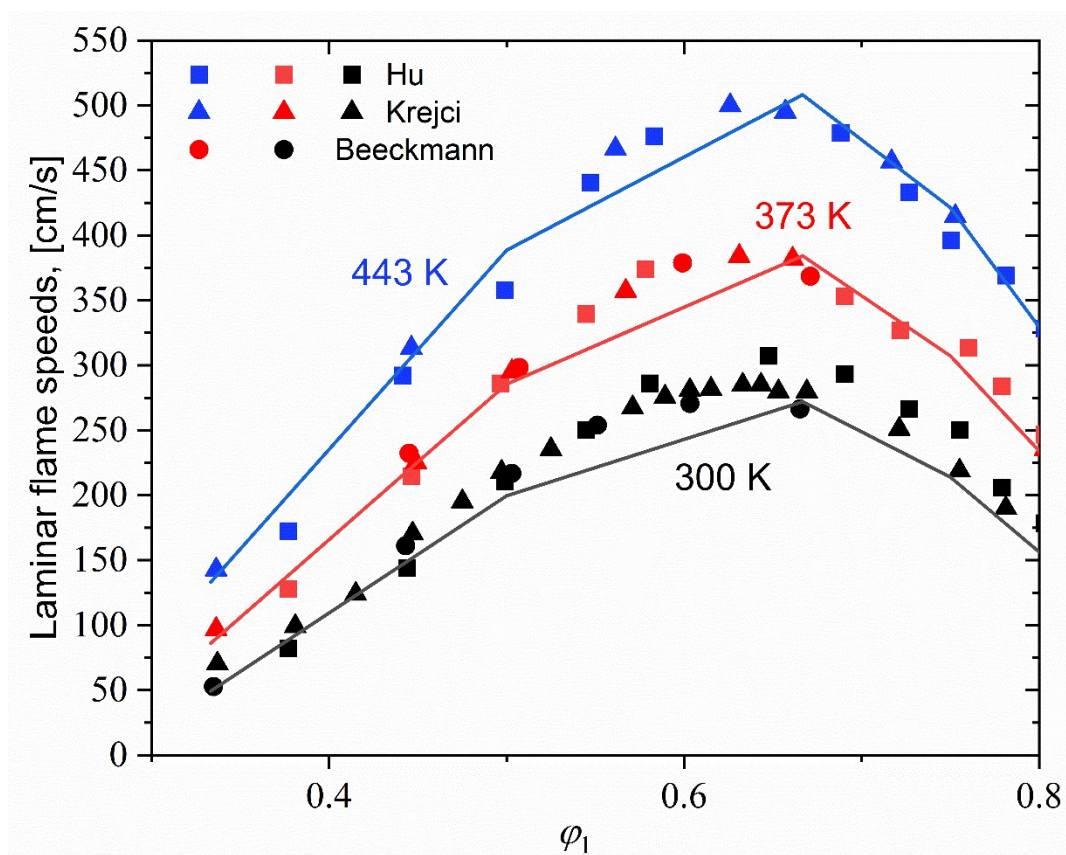

Fig. S1. Laminar flame speeds of H<sub>2</sub>/air flame varying with normalized equivalence ratio,  $\phi_1 = \phi / (1 + \phi)$ , at standard

pressure. Data sources of experiment: Hu (2009)<sup>1</sup>; Krejci (2013)<sup>2</sup>; Beeckmann (2016)<sup>3</sup>.

### 1.2 Shrestha et al.<sup>4</sup>

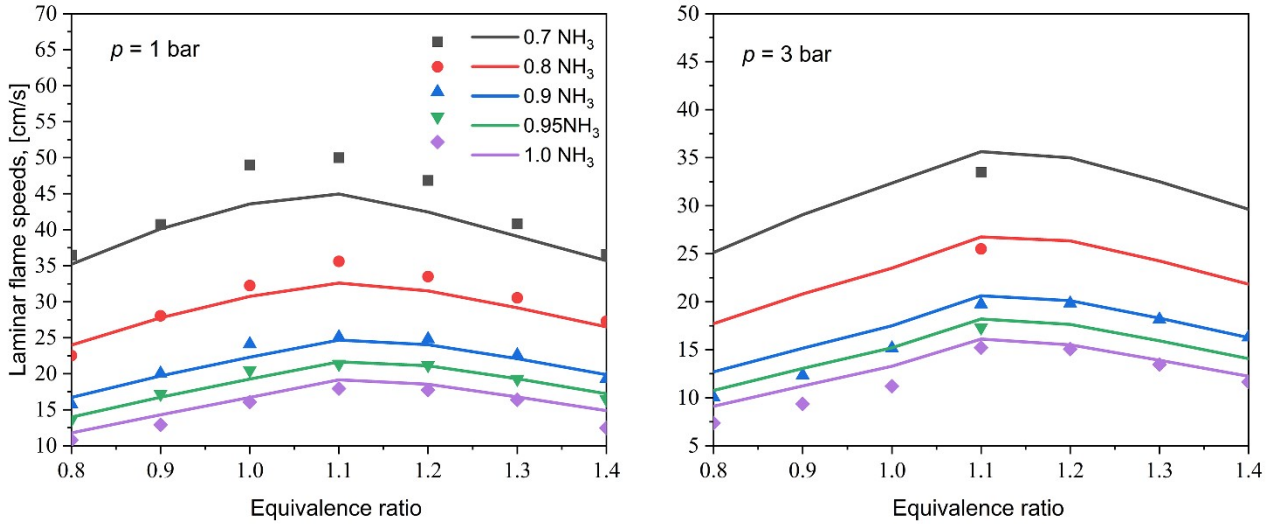

**Fig. S2.** Laminar flame speeds predictions for  $\text{NH}_3/\text{H}_2/\text{air}$  mixtures at variable pressure.  $T = 473 \text{ K}$ .

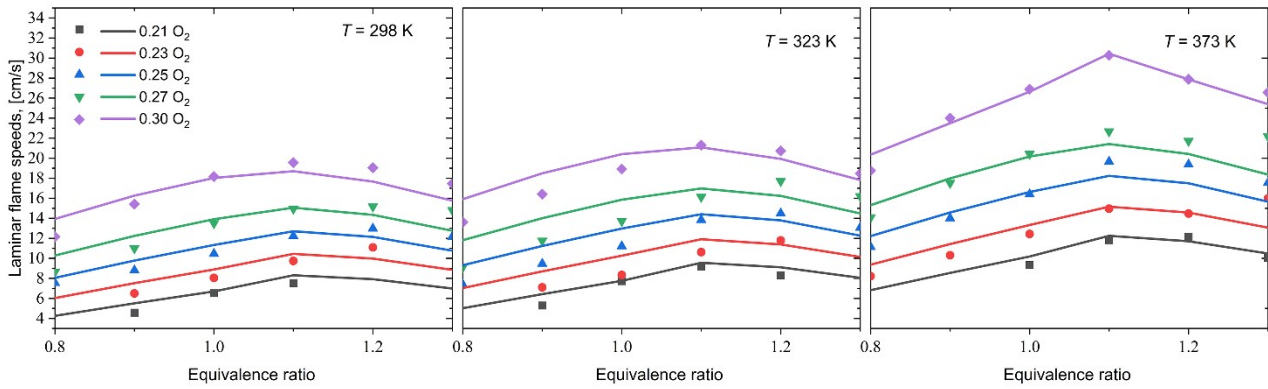

**Fig. S3.** Laminar flame speeds predictions for  $\text{NH}_3/\text{O}_2/\text{N}_2$  mixtures at variable oxygen content.  $p = 1 \text{ bar}$ .

### 1.3 Mei et al.<sup>5</sup>

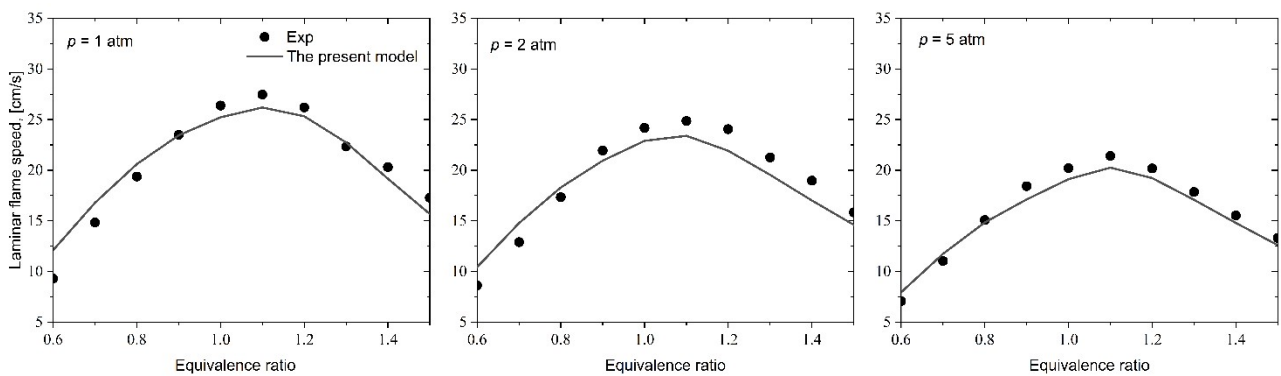

**Fig. S4.** Laminar flame speeds of  $\text{NH}_3/(35\% \text{O}_2/65\% \text{N}_2)$  mixtures at  $T = 298 \text{ K}$  and  $p = 1\text{--}5 \text{ atm}$ .

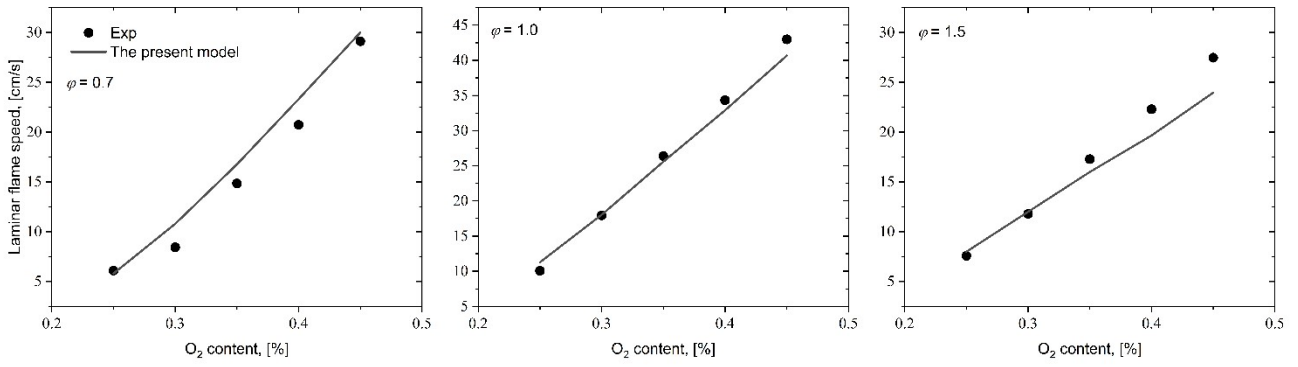

**Fig. S5.** Laminar flame speeds result of  $\text{NH}_3/\text{O}_2/\text{N}_2$  mixtures at  $T = 298 \text{ K}$  and  $p = 1 \text{ atm}$  with different oxygen contents.

1.4 Lhuillier et al. <sup>6</sup>

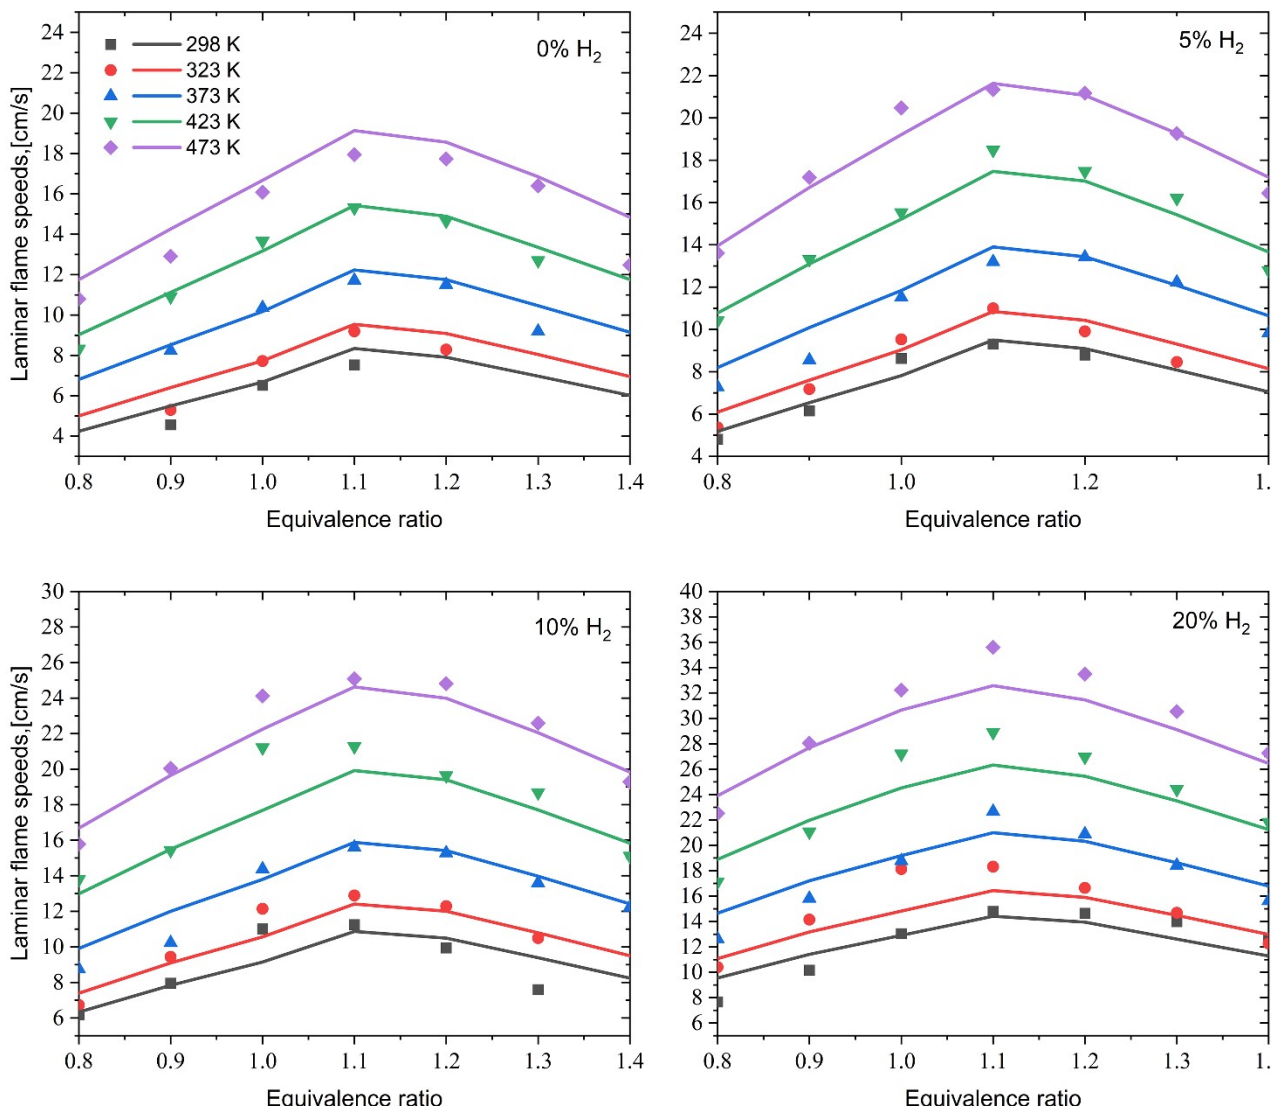

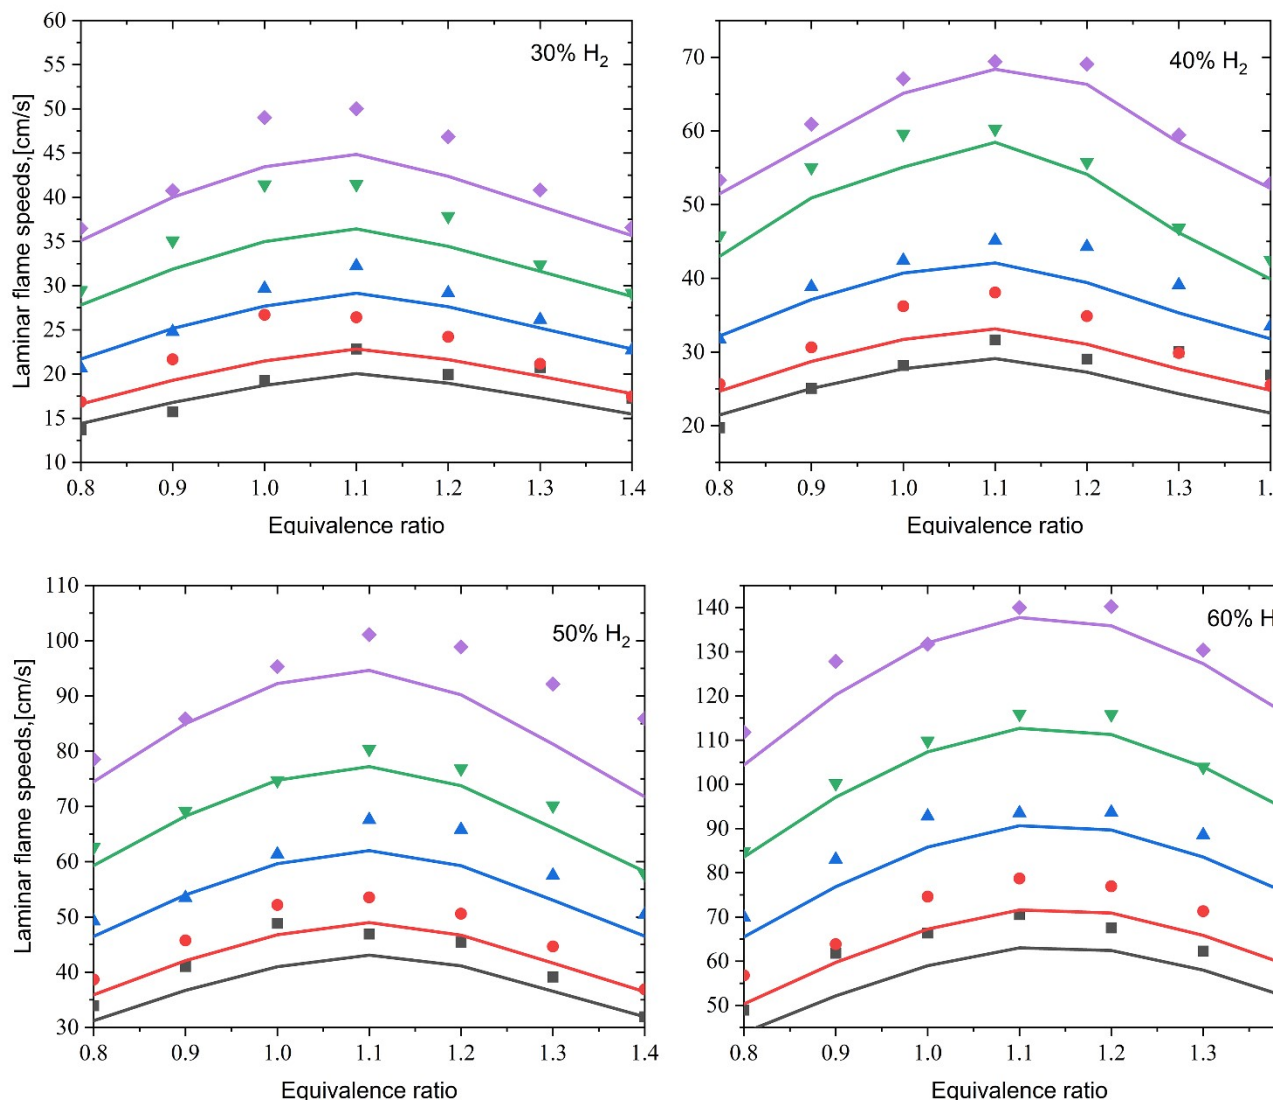

Fig. S6. Laminar flame speeds result of NH<sub>3</sub>/H<sub>2</sub>/air mixtures at  $T = 298\text{--}473\text{ K}$ ,  $p = 1\text{ atm}$  and  $x_{\text{H}_2} = 0\text{--}60\%$ .

## 2 Ignition delay time

### 2.1 Dai et al. <sup>7</sup>

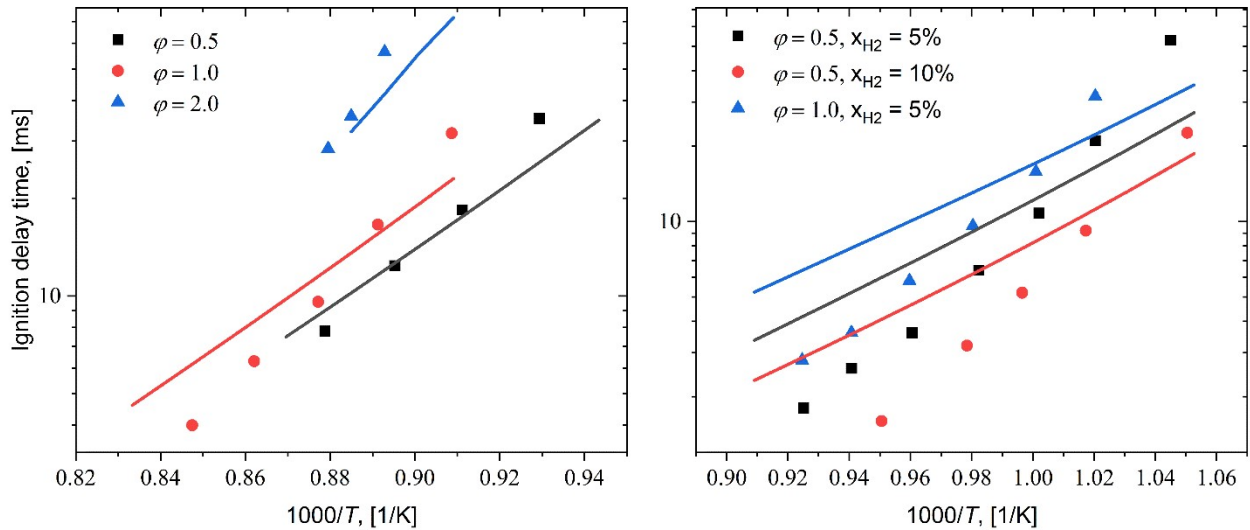

**Fig. S7.** Ignition delay times of  $\text{NH}_3/\text{O}_2$  and  $\text{NH}_3/\text{O}_2/\text{H}_2$  mixture measured in a rapid compression machines (RCM) at  $\phi = 0.5\text{--}2.0$ ,  $p = 60$  bar.

2.2 Pochet et al. <sup>8</sup>

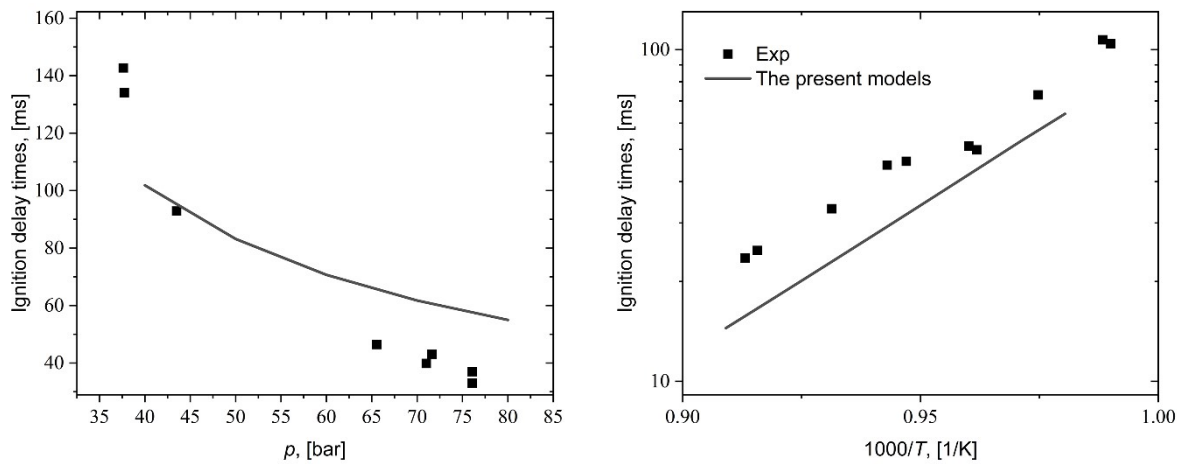

**Fig. S8.** Ignition delay times of  $\text{NH}_3/\text{O}_2$  mixture measured in a rapid compression machines (RCM) at different  $T$  and  $p$ .  $\phi = 0.35$ .

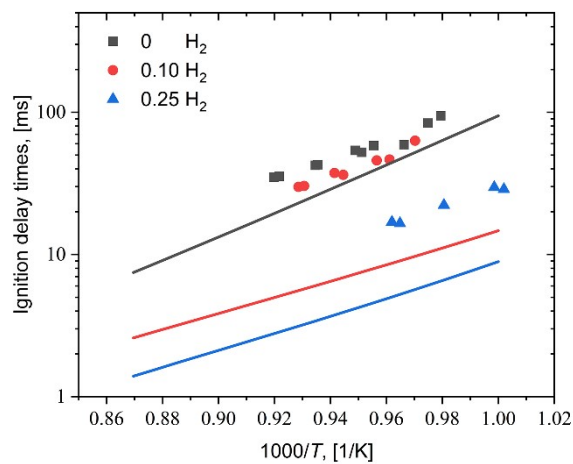



**Figure. S9.** Ignition delay times of  $\text{NH}_3/\text{O}_2/\text{H}_2$  mixture measured in a rapid compression machines (RCM) at different  $T$ .  $x_{\text{H}_2} = 0\text{--}25\%$ ,  $\phi = 0.35$ ,  $p = 43.5$  bar

### 3 species concentration

#### 3.1 Stagni et al.<sup>9</sup>

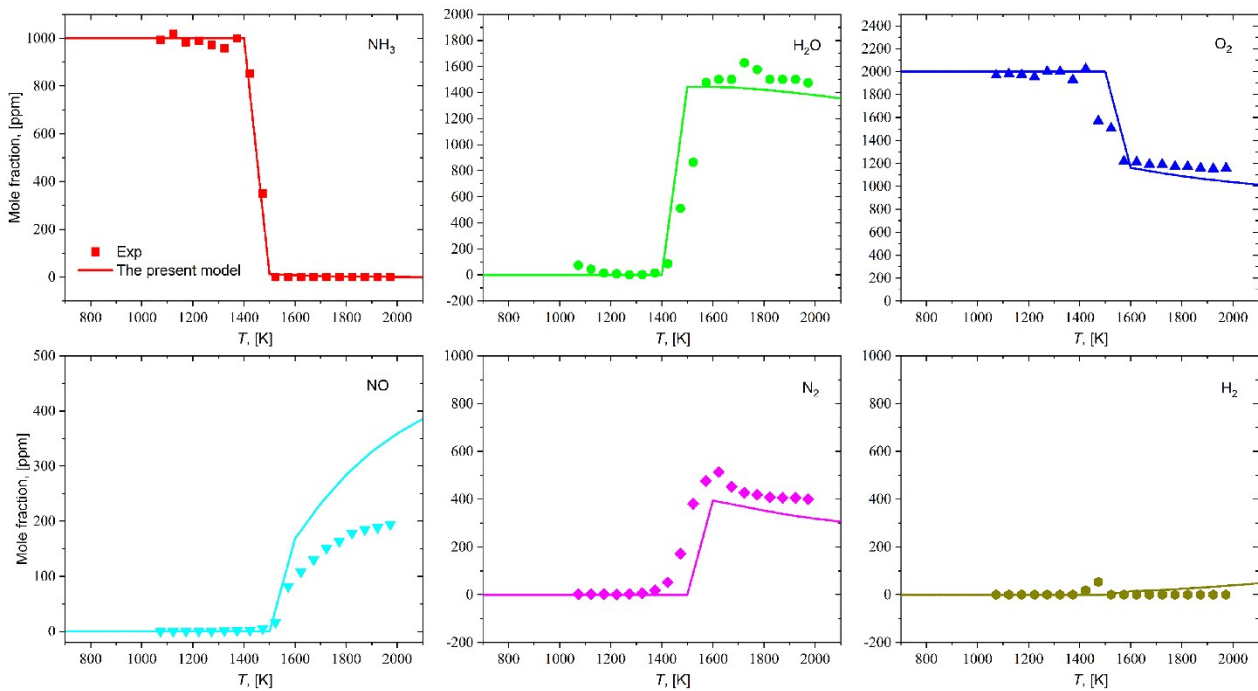

**Fig. S10.** Oxidation of 1000 ppm  $\text{NH}_3$  with 2000 ppm  $\text{O}_2$  in a FR. Experimental and modeling results.  $p = 950$  torr.  $\tau = 0.05$  s.

#### 3.2 Alturaifi et al.<sup>10</sup>

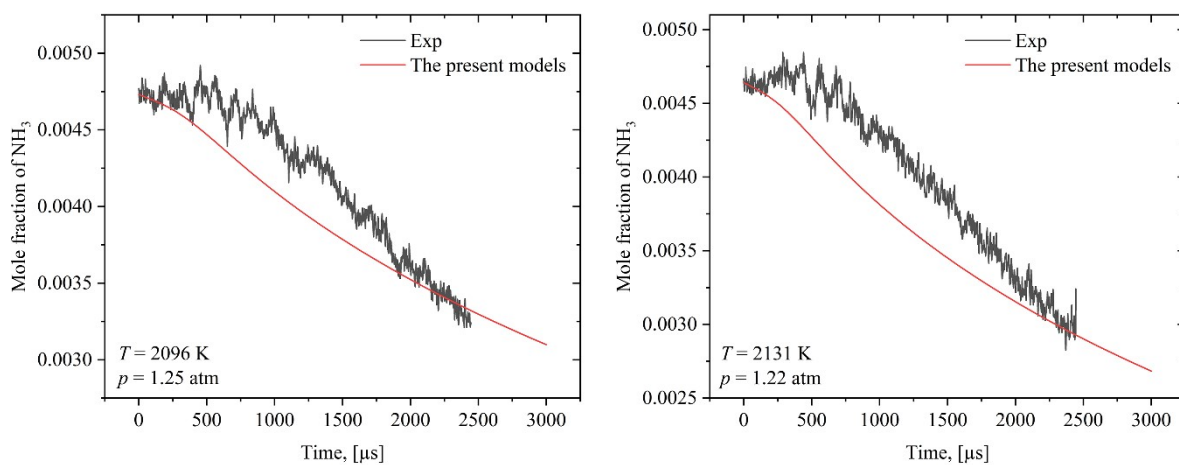

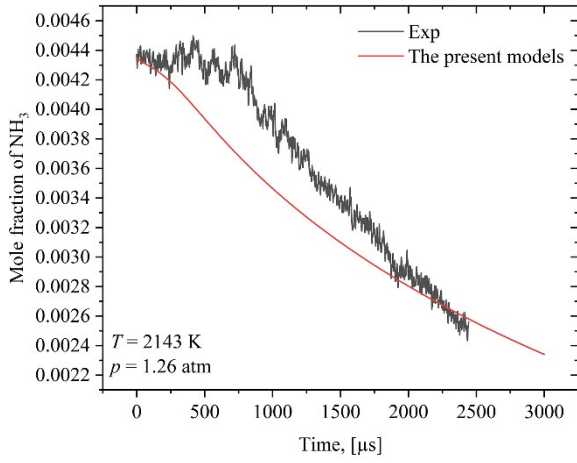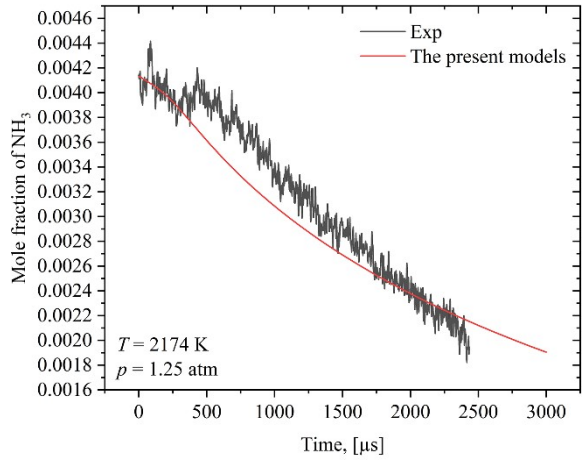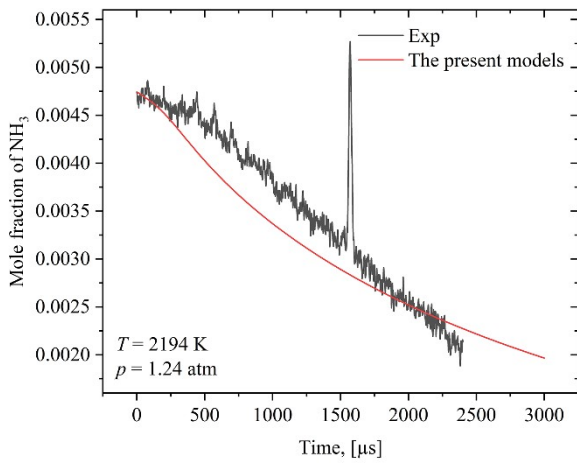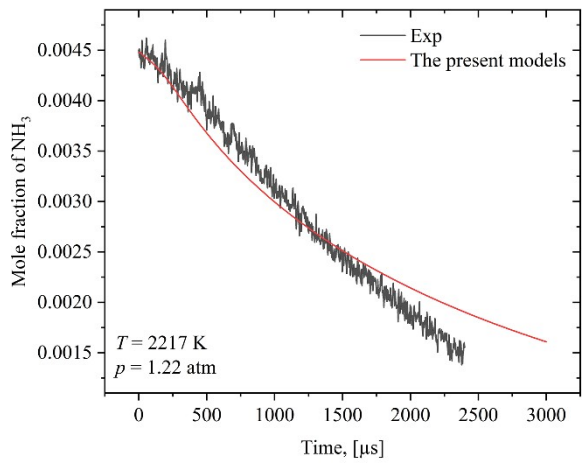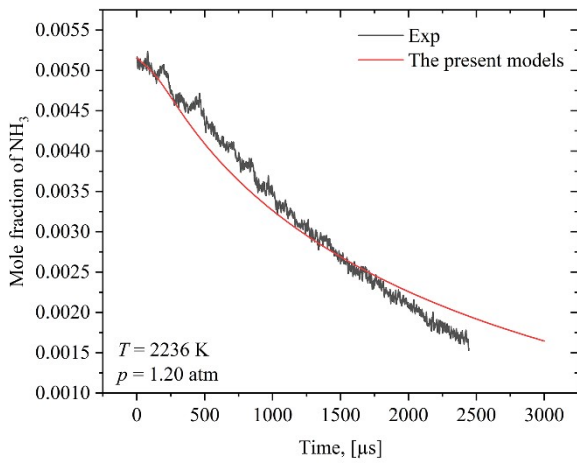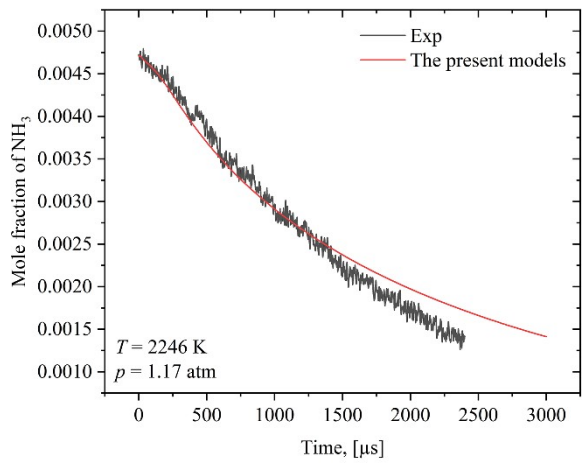

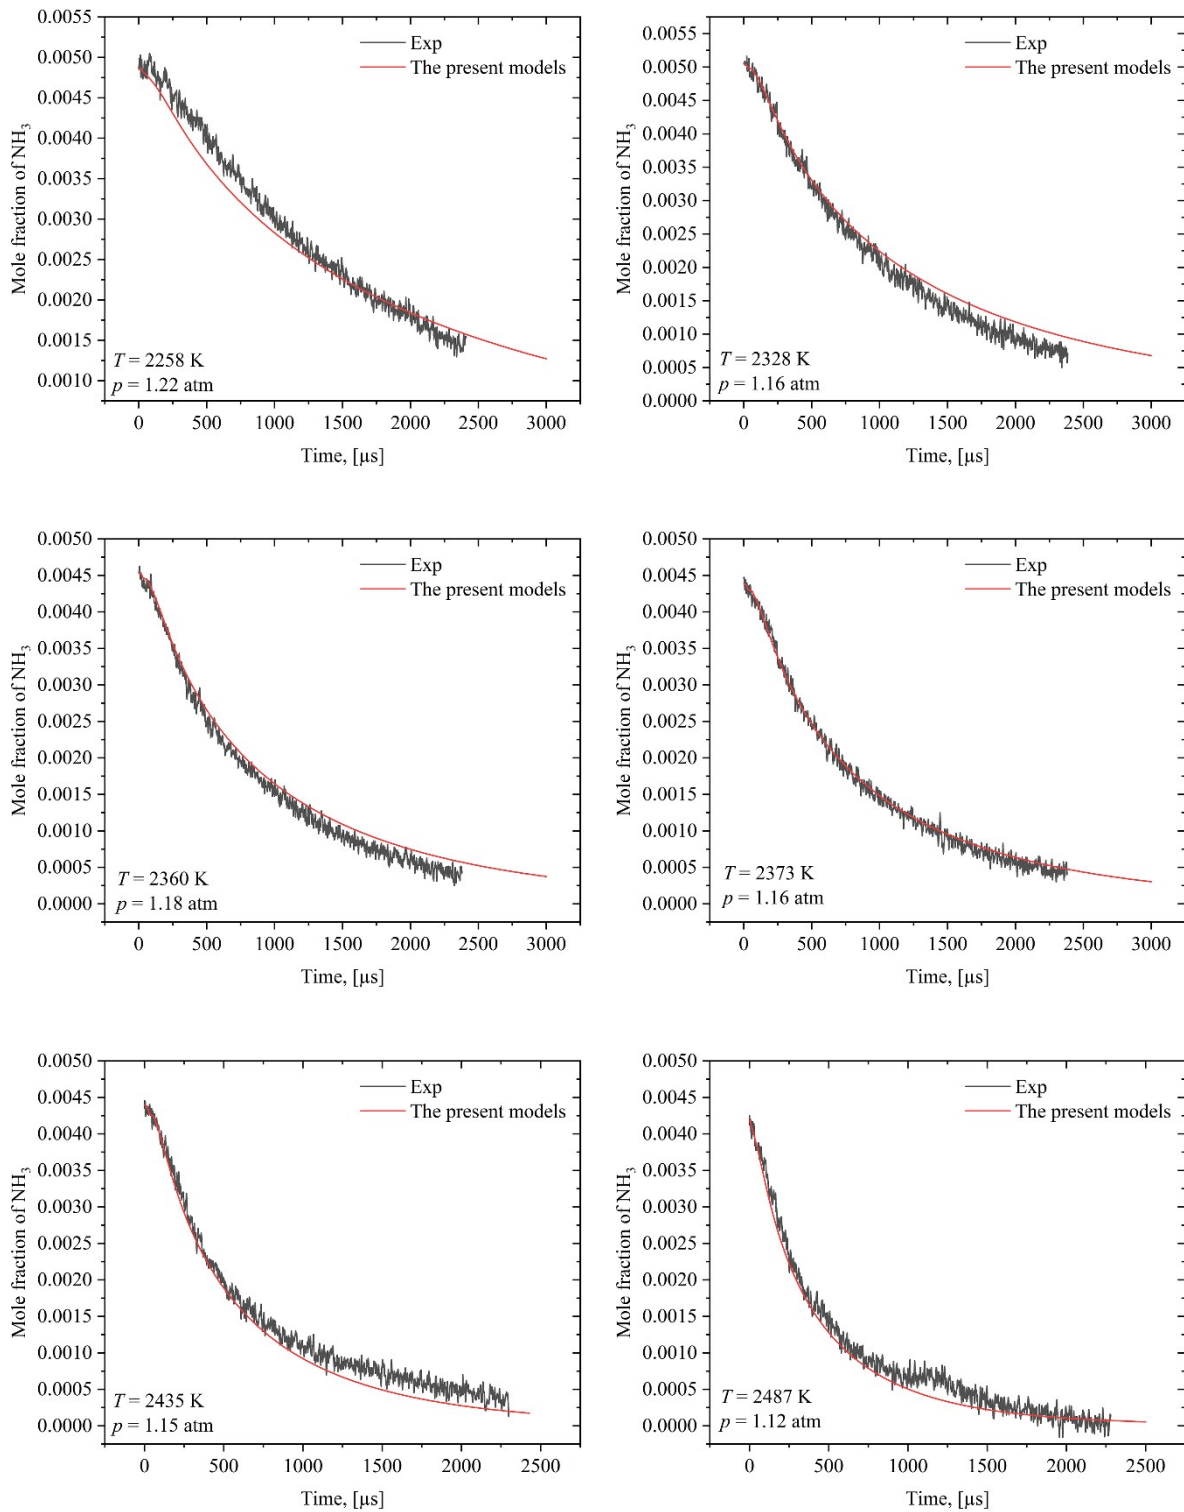

**Fig. S11.** Experiments and modeling results for  $\text{NH}_3$  speciation profiles for a mixture of 0.5%  $\text{NH}_3$  in shock tube.



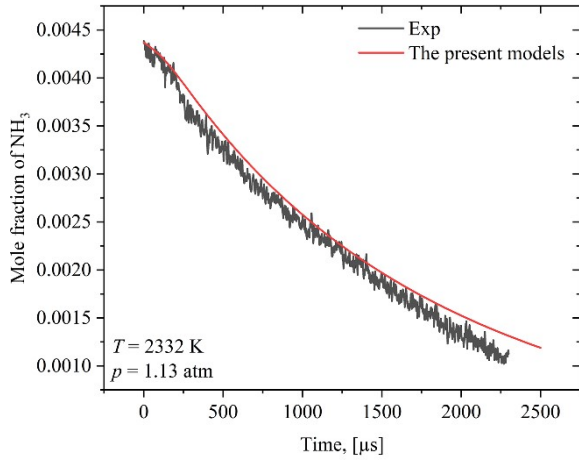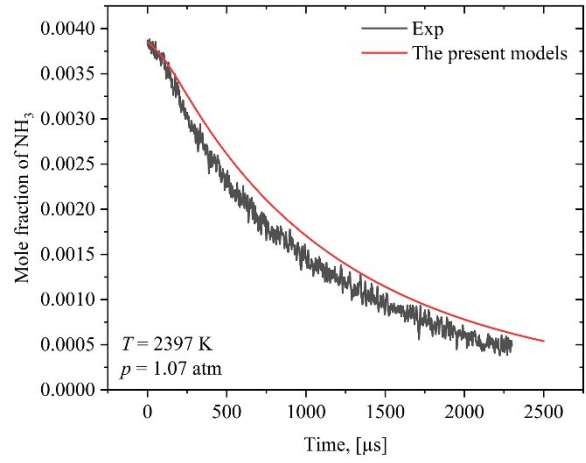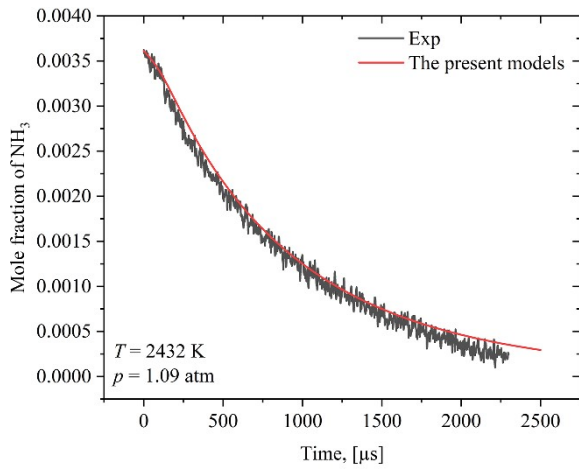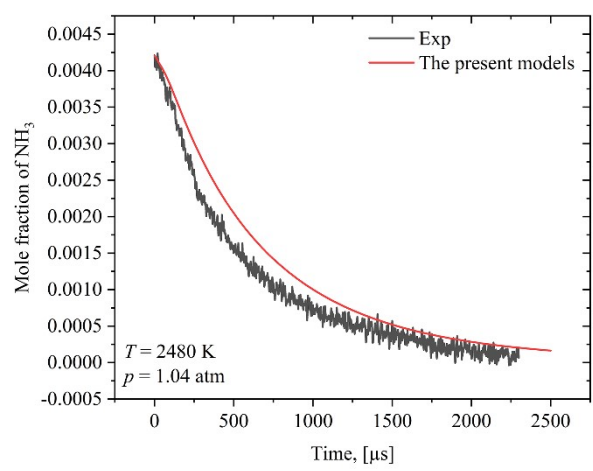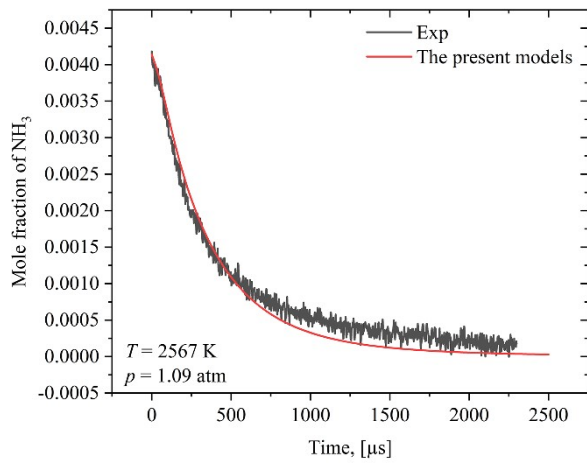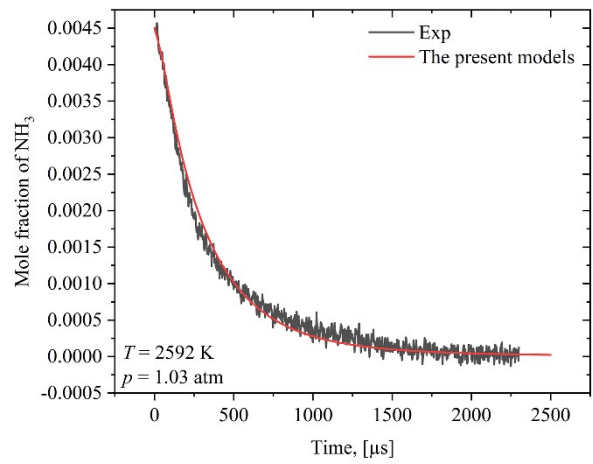

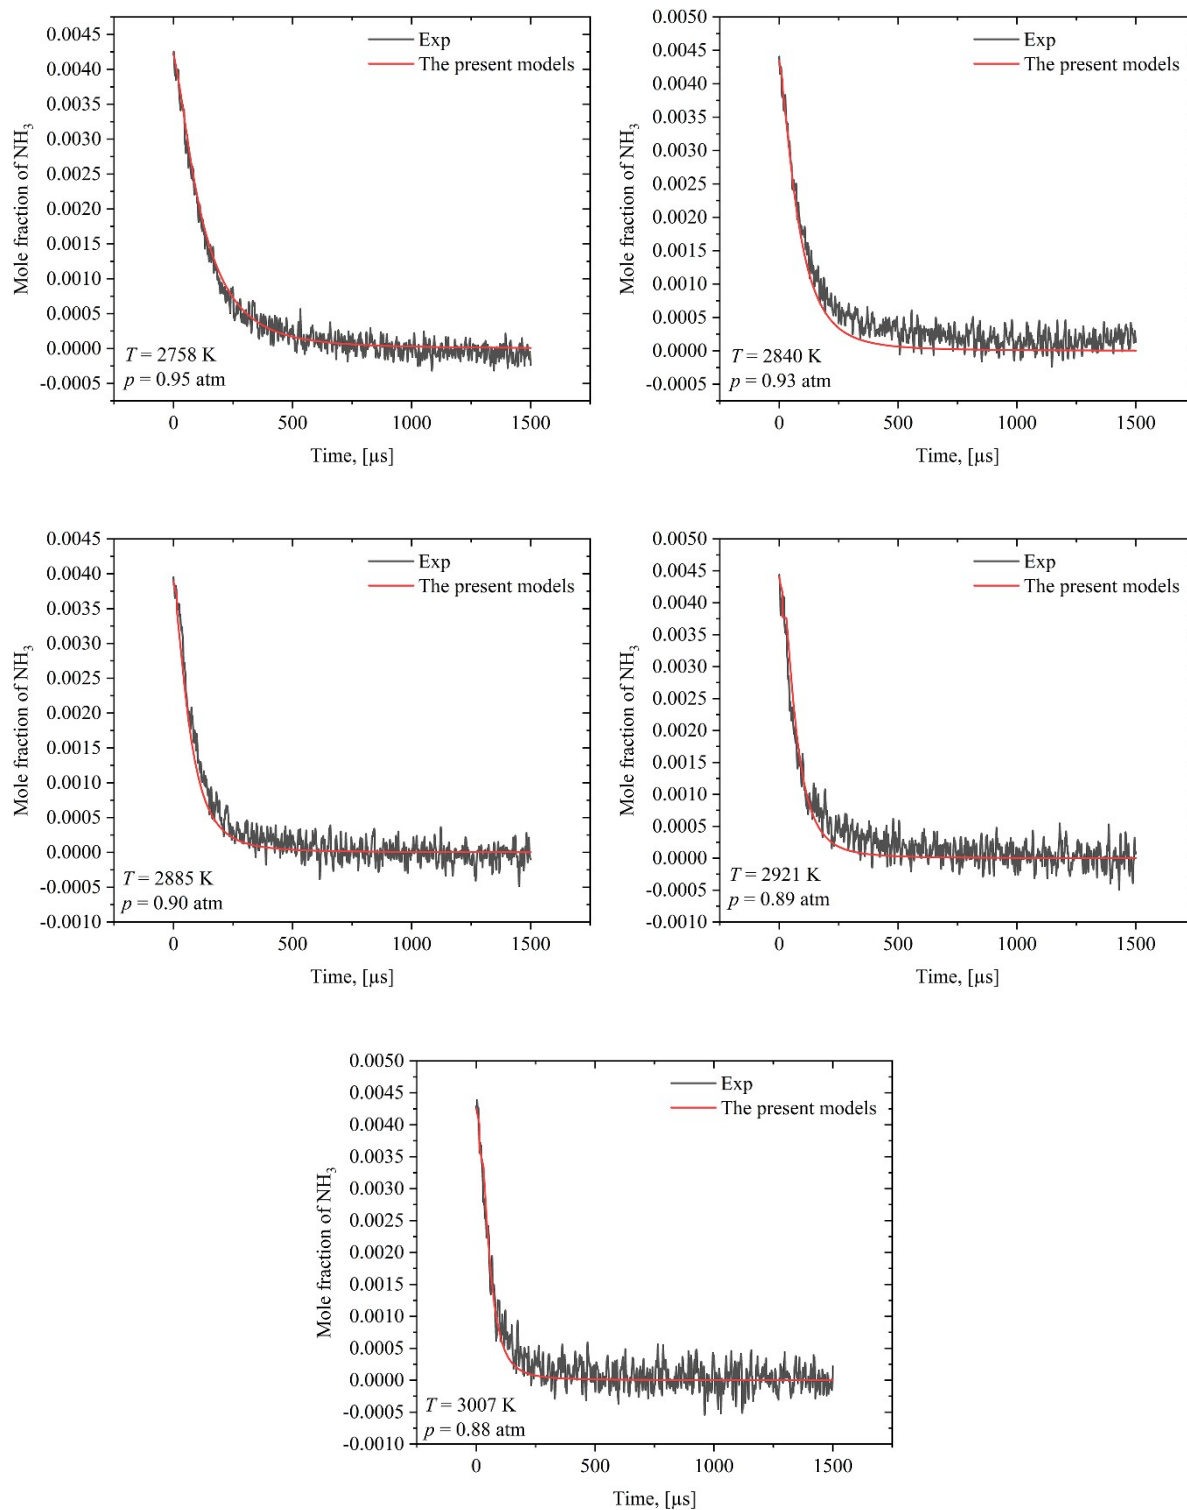

**Fig. S12.** Experiments and modeling results for  $\text{NH}_3$  speciation profiles for a mixture of 0.42%  $\text{NH}_3$ /2%  $\text{H}_2$  in shock tube.

3.3 Alturaifi et al. <sup>11</sup>

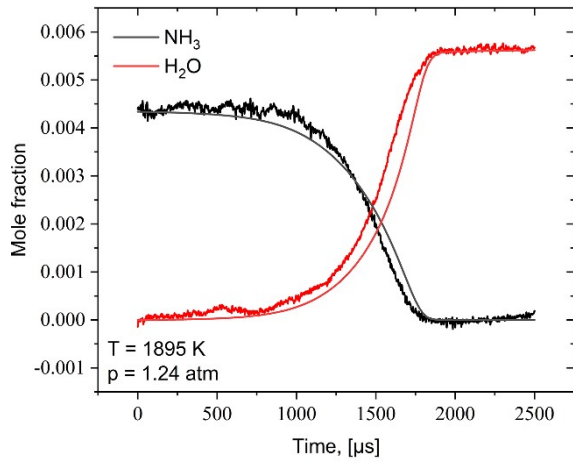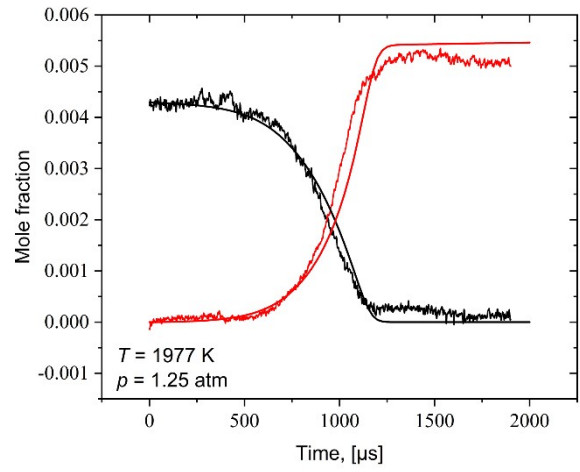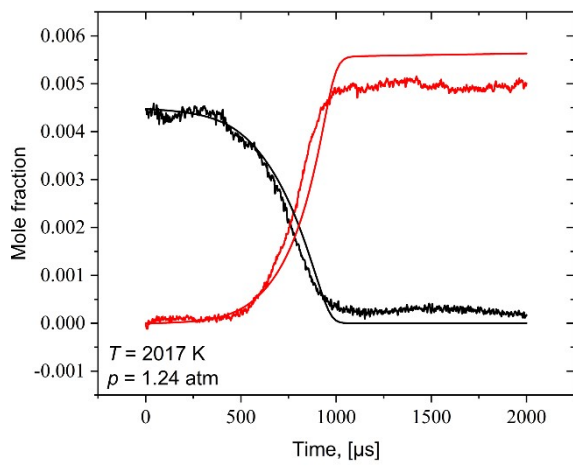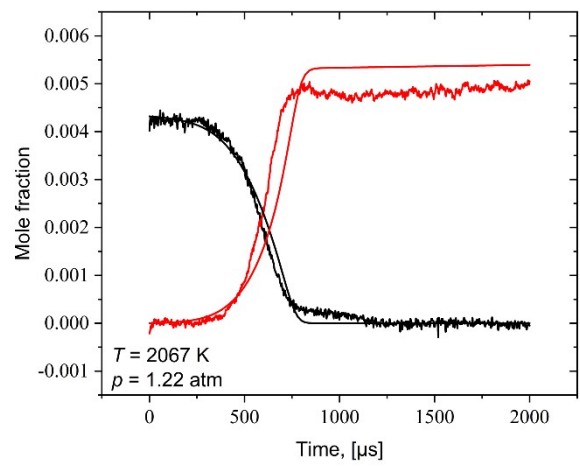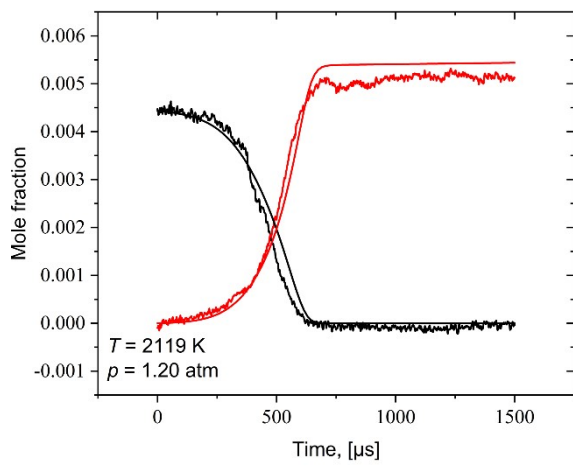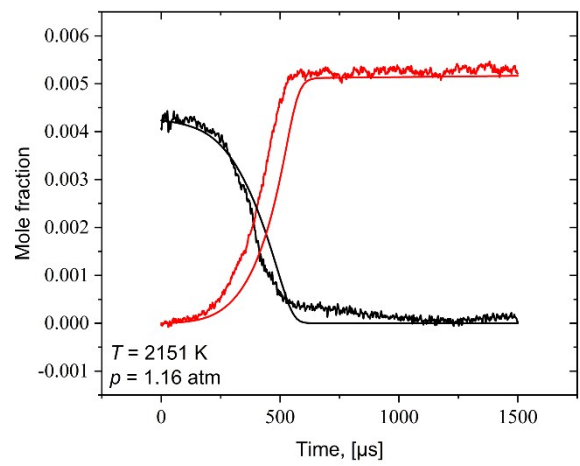

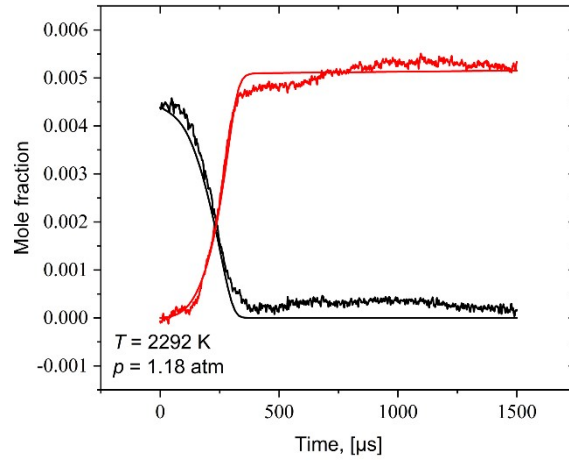

**Fig. S13.**  $\text{NH}_3$  and  $\text{H}_2\text{O}$  speciation profiles in the oxidation of  $\text{NH}_3$  in  $\sim 99\%$  Ar.  $\varphi = 0.58$ .

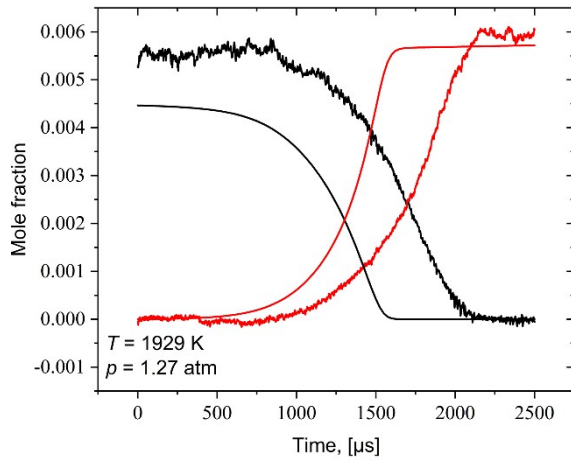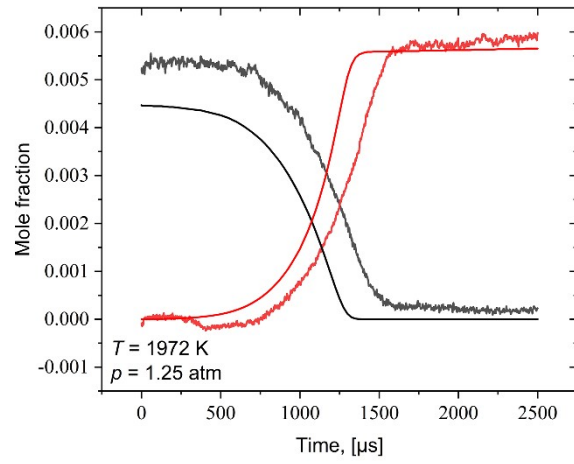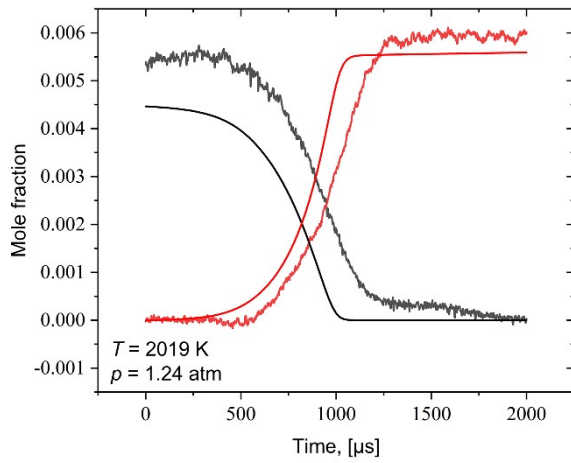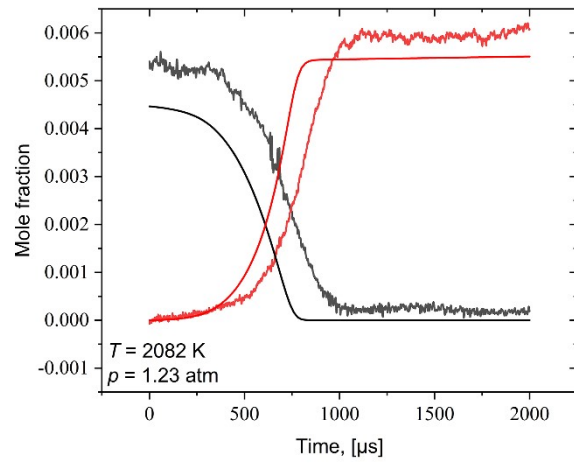

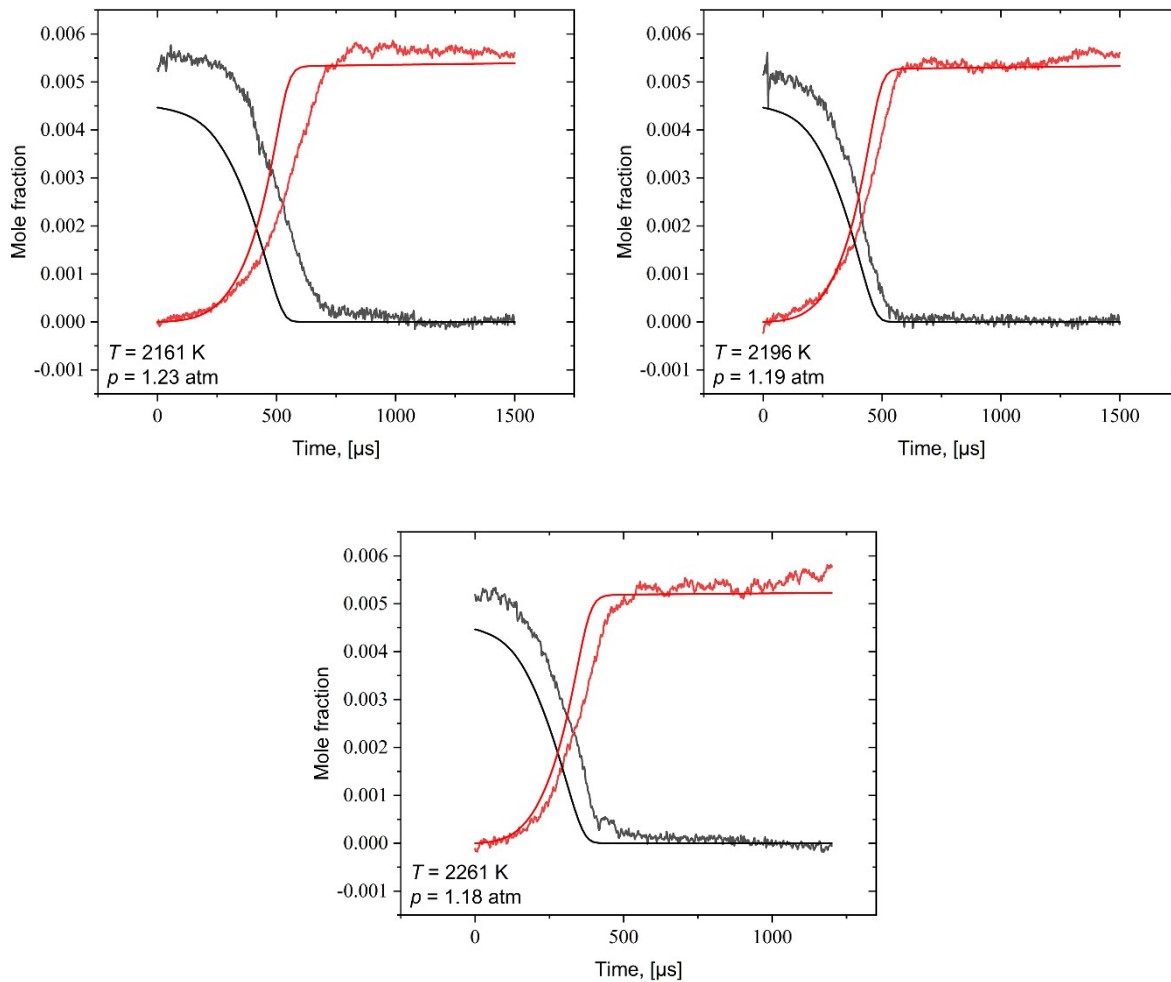

**Fig. S14.**  $\text{NH}_3$  and  $\text{H}_2\text{O}$  speciation profiles in the oxidation of  $\text{NH}_3$  in  $\sim 99\%$  Ar.  $\phi = 0.90$ .

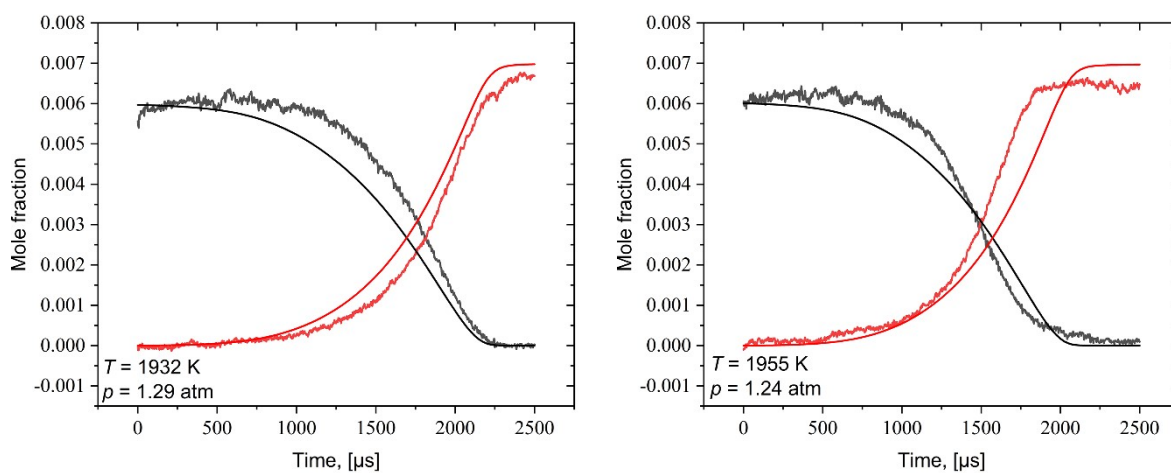



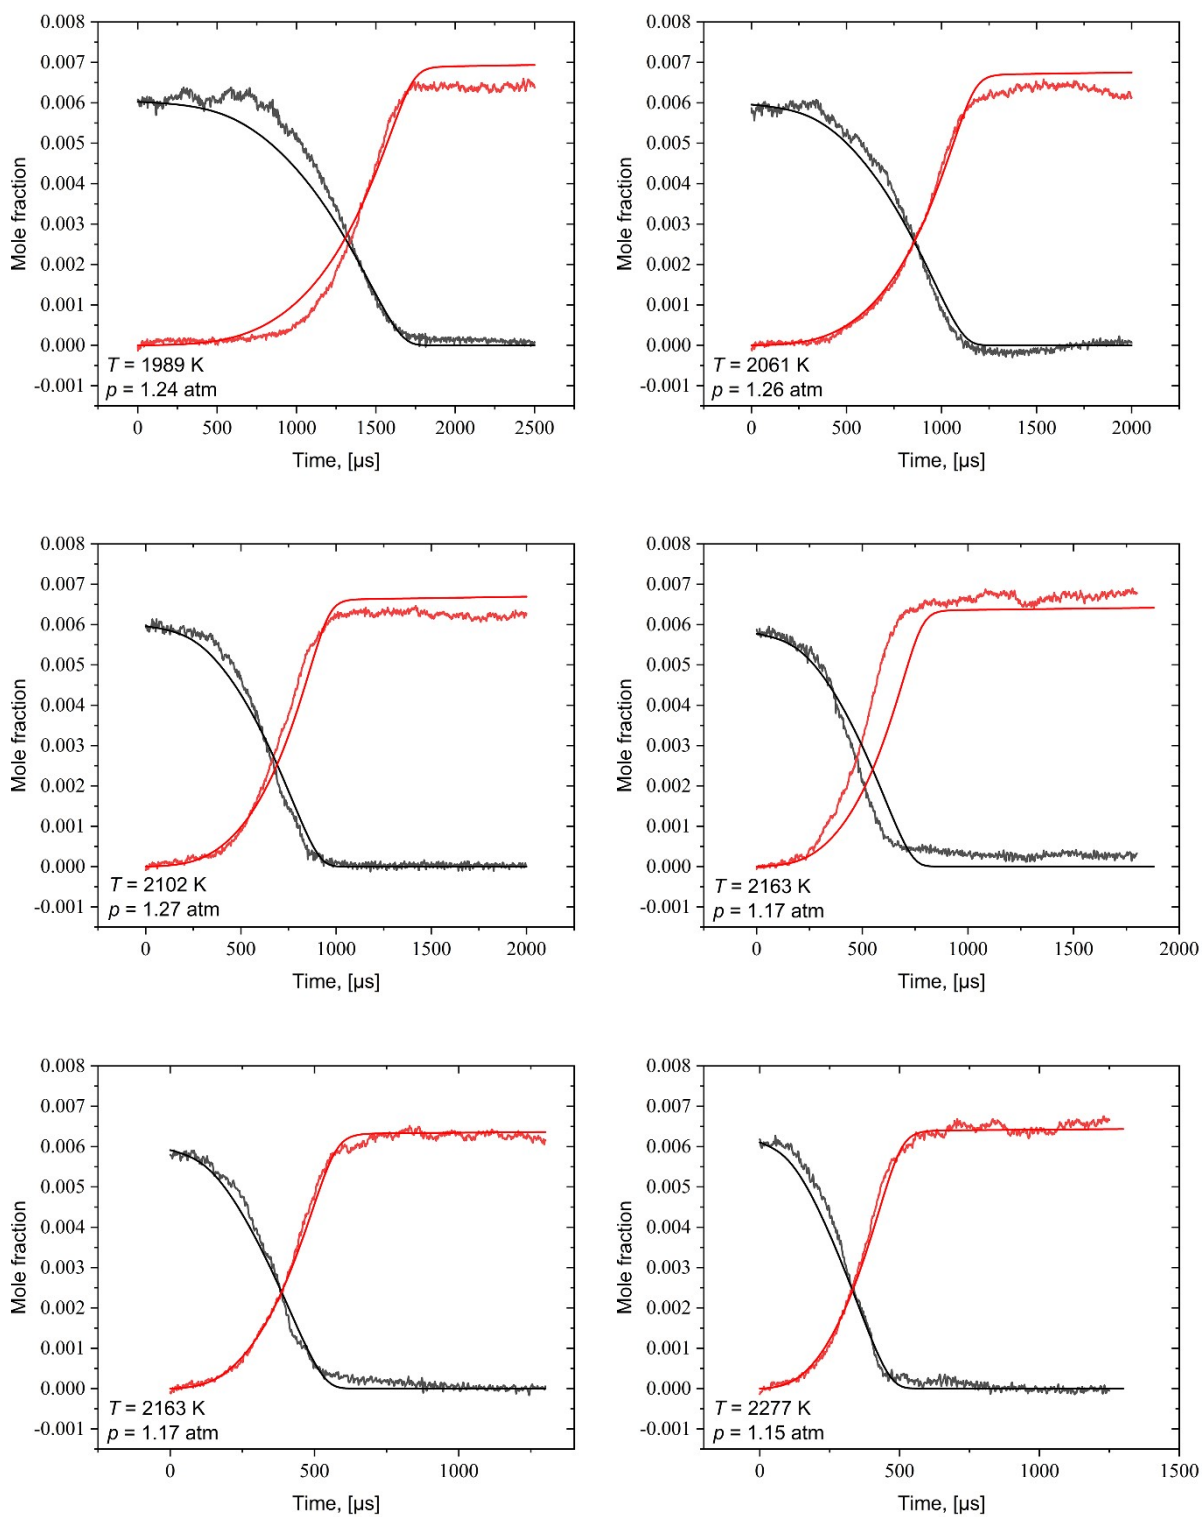

**Fig. S15.**  $\text{NH}_3$  and  $\text{H}_2\text{O}$  speciation profiles in the oxidation of  $\text{NH}_3$  in  $\sim 99\%$  Ar.  $\varphi = 1.06$ .

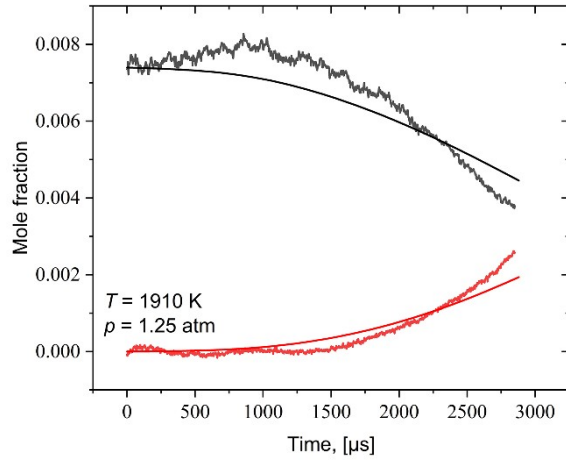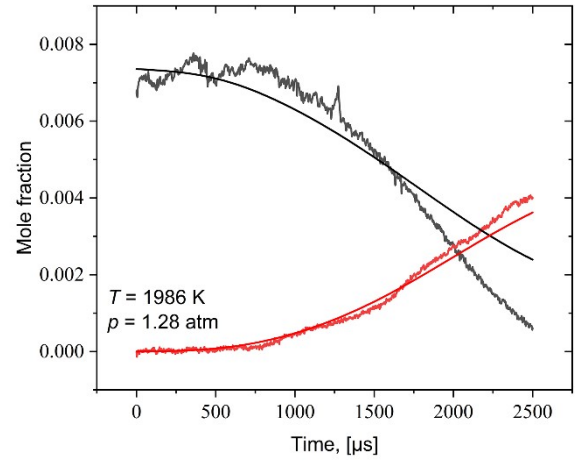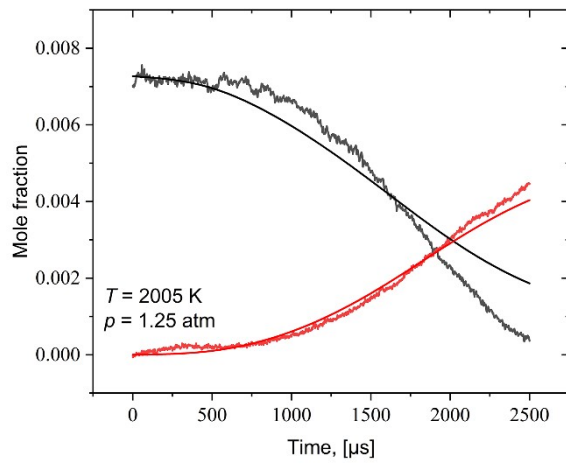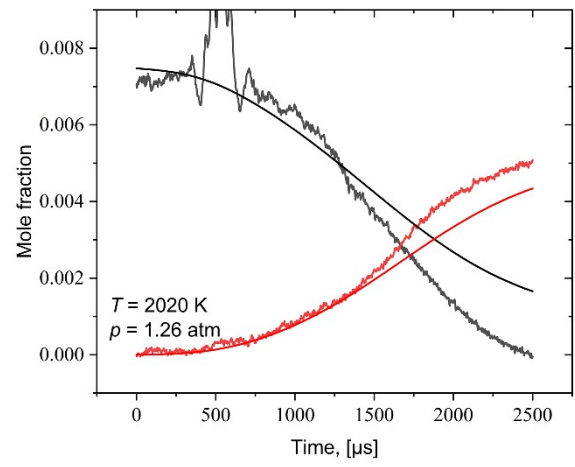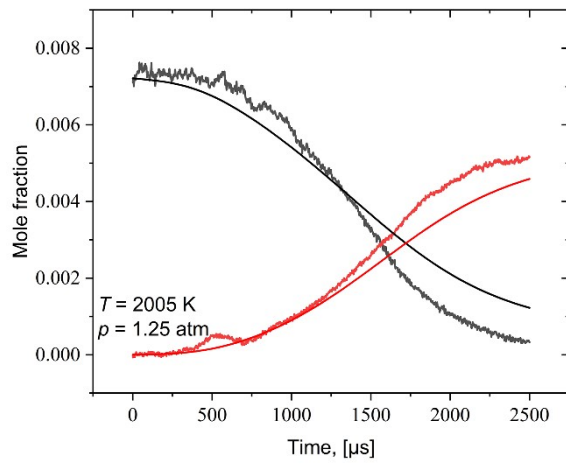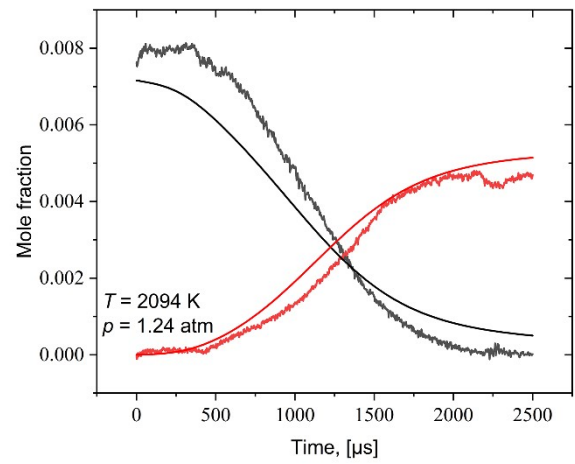

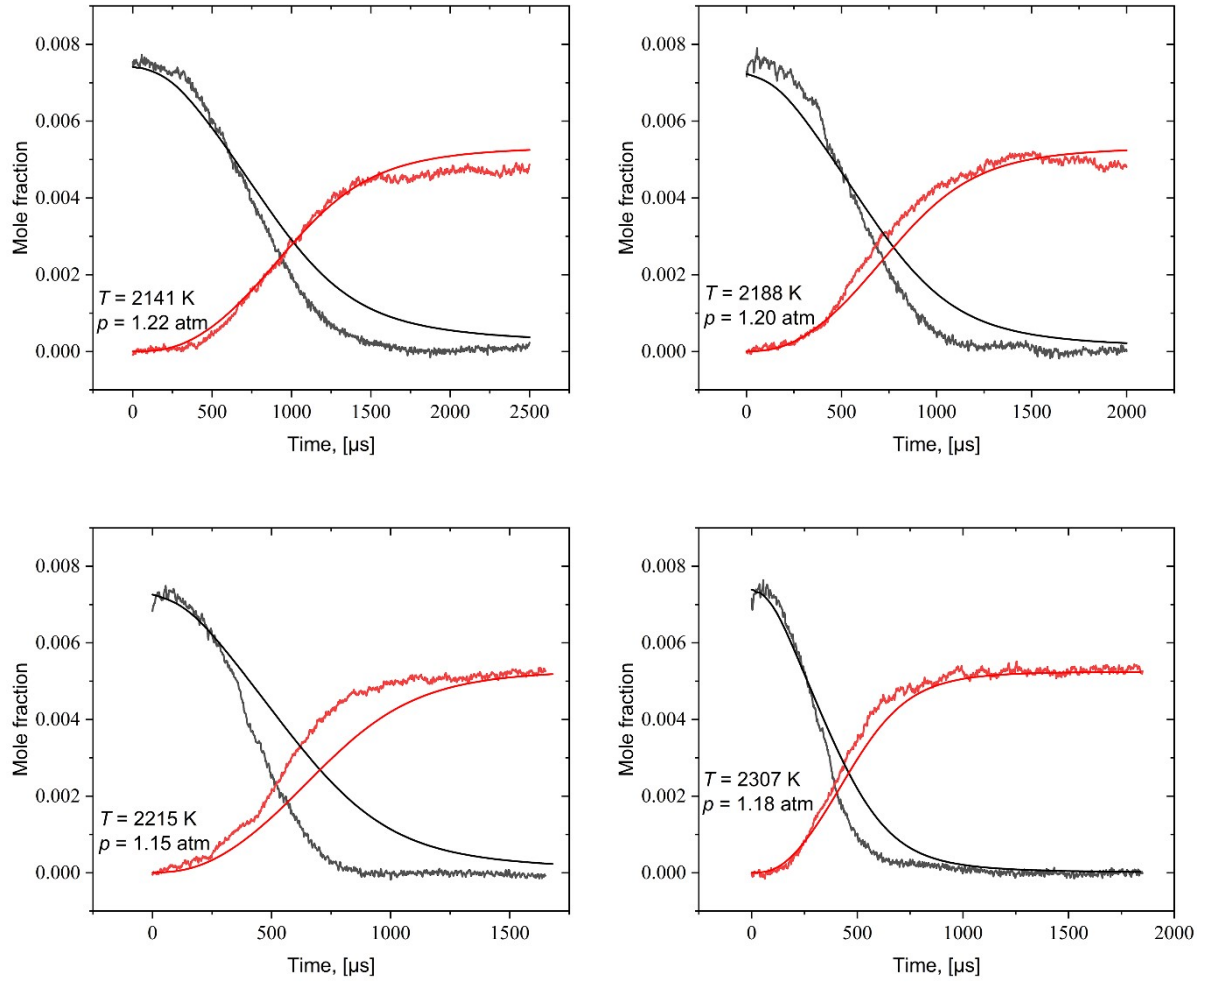

**Fig. S16.**  $\text{NH}_3$  and  $\text{H}_2\text{O}$  speciation profiles in the oxidation of  $\text{NH}_3$  in  $\sim 99\%$  Ar.  $\phi = 2.03$ .

3.4 Osipova et al. <sup>12</sup>

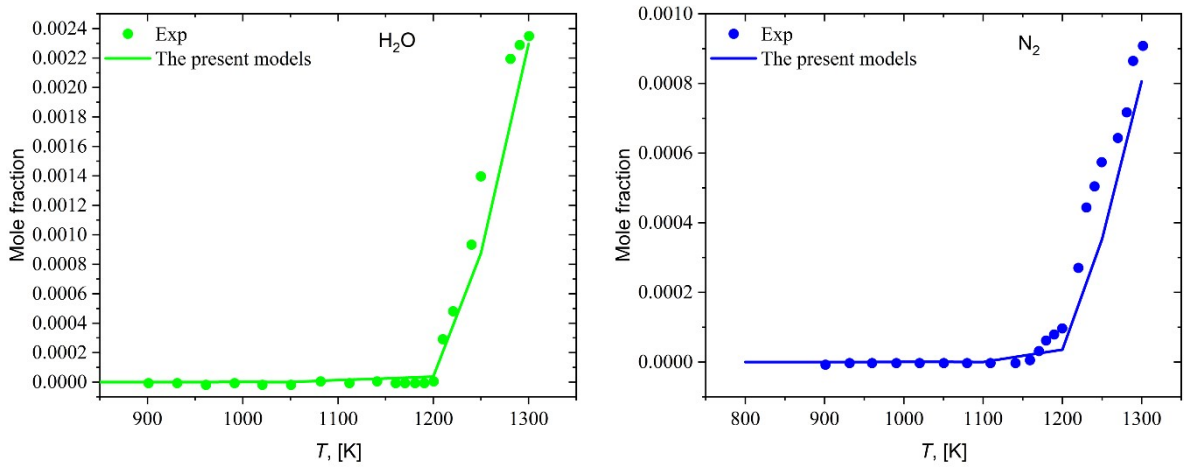

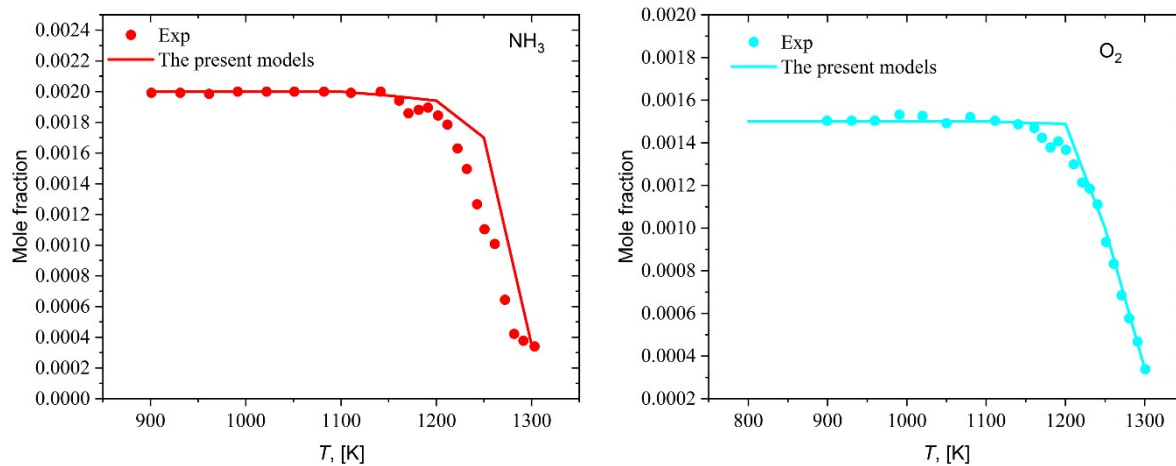

**Fig. S17.** Mole fraction profiles of reagents and main oxidation products in the stoichiometric  $\text{NH}_3/\text{O}_2/\text{Ar}$  blend ( $p = 1$  atm,  $T = 900$ – $1300$  K,  $\tau = 1$  s,  $\text{NH}_3 = 2000$  ppm).

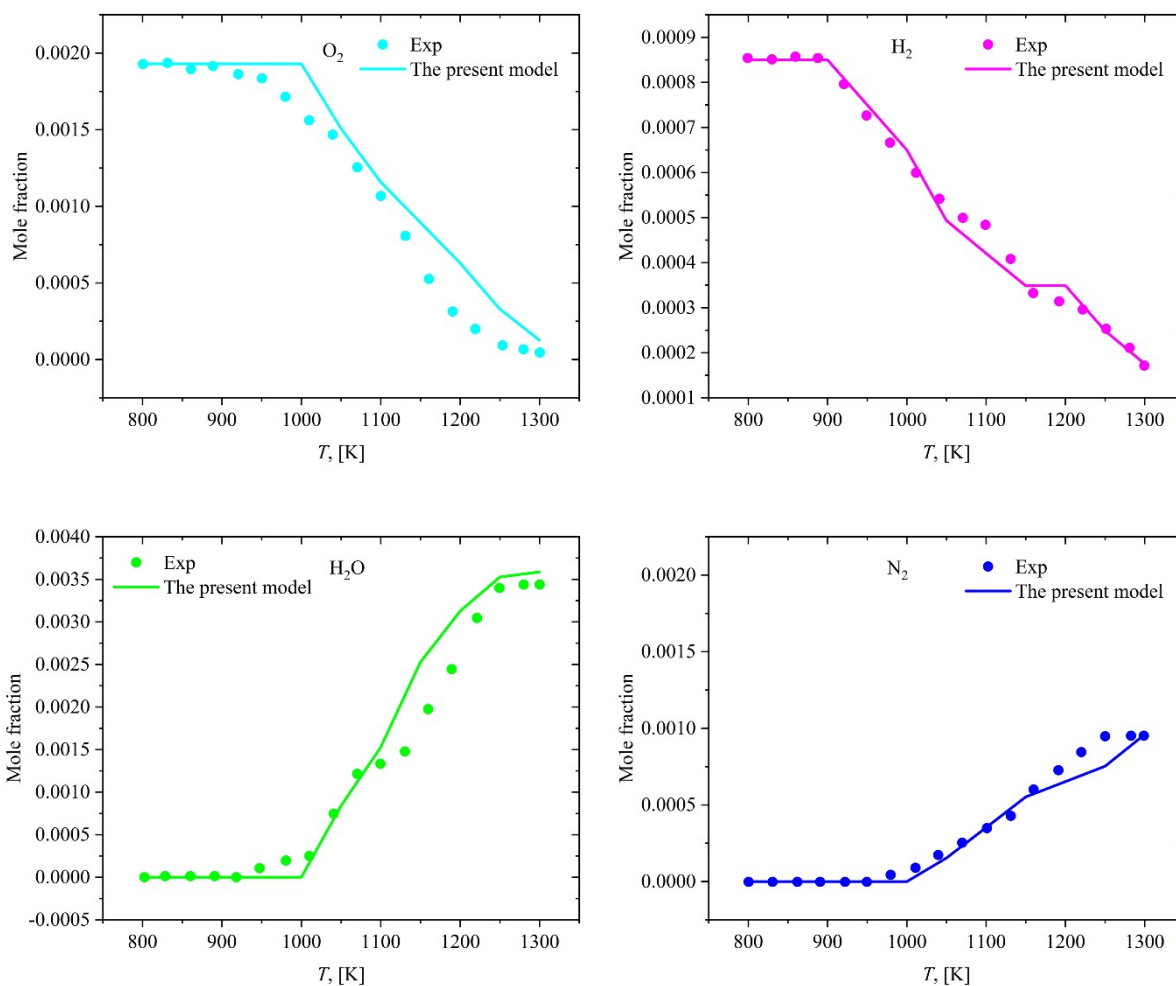

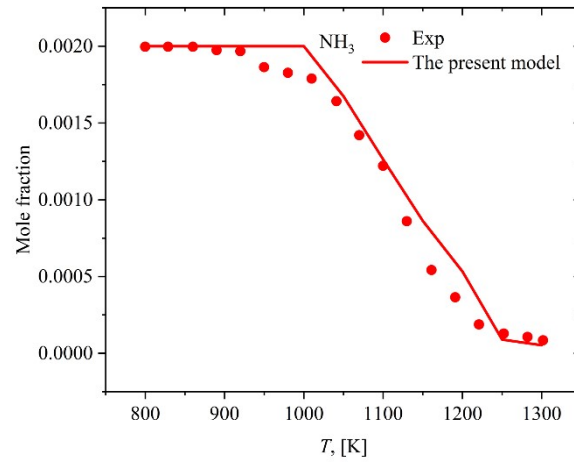

**Fig. S18.** Mole fractions profiles of reagents and main oxidation products in the stoichiometric  $\text{NH}_3/\text{H}_2/\text{O}_2/\text{Ar}$  blend ( $p = 1 \text{ atm}$ ,  $T = 800\text{--}1300 \text{ K}$ ,  $\tau = 1 \text{ s}$ ,  $\text{NH}_3 = 2000 \text{ ppm}$ ,  $\text{NH}_3/\text{H}_2 = 7/3$  by volume).



---

## References:

- 1 E. Hu, Z. Huang, J. He, C. Jin and J. Zheng, *International Journal of Hydrogen Energy*, 2009, **34**, 4876–4888.
- 2 M. C. Krejci, O. Mathieu, A. J. Vissotski, S. Ravi, T. G. Sikes, E. L. Petersen, W. Metcalfe, A. Keromnes and H. J. Curran, .
- 3 J. Beeckmann, R. Hesse, S. Kruse, A. Berens, N. Peters, H. Pitsch and M. Matalon, *Proceedings of the Combustion Institute*, 2017, **36**, 1531–1538.
- 4 K. P. Shrestha, C. Lhuillier, A. A. Barbosa, P. Brequigny, F. Contino, C. Mounaïm-Rousselle, L. Seidel and F. Mauss, *Proceedings of the Combustion Institute*, 2021, **38**, 2163–2174.
- 5 B. Mei, X. Zhang, S. Ma, M. Cui, H. Guo, Z. Cao and Y. Li, *Combustion and Flame*, 2019, **210**, 236–246.
- 6 C. Lhuillier, P. Brequigny, N. Lamoureux, F. Contino and C. Mounaïm-Rousselle, *Fuel*, 2020, **263**, 116653.
- 7 L. Dai, S. Gersen, P. Glarborg, H. Levinsky and A. Mokhov, *Combustion and Flame*, 2020, **215**, 134–144.
- 8 M. Pochet, V. Dias, B. Moreau, F. Foucher, H. Jeanmart and F. Contino, *Proceedings of the Combustion Institute*, 2019, **37**, 621–629.
- 9 A. Stagni, C. Cavallotti, S. Arunthanayothin, Y. Song, O. Herbinet, F. Battin-Leclerc and T. Faravelli, *React. Chem. Eng.*, 2020, **5**, 696–711.
- 10 S. A. Alturaifi, O. Mathieu and E. L. Petersen, *Combustion and Flame*, 2022, **235**, 111694.
- 11 S. A. Alturaifi, O. Mathieu and E. L. Petersen, *Proceedings of the Combustion Institute*, 2023, **39**, 233–241.
- 12 K. N. Osipova, X. Zhang, S. M. Sarathy, O. P. Korobeinichev and A. G. Shmakov, *Fuel*, 2022, **310**, 122202.
